# Supplementary material for: UNAM-1: a robust CuIand CuIIcontaining 3D-hydrogen-bonded framework with permanent porosity and reversible SO2sorption
Source: Royal Society of Chemistry journal article supplement (doi:10.1039/c9ta07834g), 2019-01-01
Supplement: c9ta07834g1.pdf [file c9ta07834g1.pdf]

## Electronic Supplementary Information for

### **UNAM-1: A robust Cu<sup>I</sup> and Cu<sup>II</sup> containing 3D-hydrogen-bonded framework with permanent porosity and reversible SO<sub>2</sub> sorption**

Ricardo Domínguez-González,<sup>a,b</sup> Irán Rojas-León,<sup>b</sup> Eva Martínez-Ahumada,<sup>c</sup> Diego Martínez-Otero,<sup>a,b</sup> Hugo A. Lara-García,<sup>d</sup> Jorge Balmaseda-Era,<sup>c</sup> Ilich A. Ibarra,<sup>c</sup> Edmundo G. Percástegui<sup>a,b</sup> and Vojtech Jancik<sup>a,b,\*</sup>

- a. Universidad Nacional Autónoma de México, Instituto de Química, Ciudad Universitaria, Ciudad de México, 04510, Mexico. E-mail: vjancik@unam.mx
- b. Centro Conjunto de Investigación en Química Sustentable UAEM-UNAM, Carretera Toluca-Atlacomulco km 14.5, Toluca, Estado de México, 50200, México.
- c. Laboratorio de Fisicoquímica y Reactividad de Superficies (LaFREs), Instituto de Investigaciones en Materiales, Universidad Nacional Autónoma de México, Circuito Exterior s/n, CU, Del Coyoacán, 04510, México D.F., México.
- d. Instituto de Física, Universidad Nacional Autónoma de México, Circuito de la Investigación científica s/n, CU, Del. Coyoacán, 04510, Ciudad de México, Mexico.

## **Index**

|                                      |    |
|--------------------------------------|----|
| Experimental.....                    | 3  |
| Infrared spectrum.....               | 4  |
| Mass spectrometry.....               | 4  |
| UV-Vis spectroscopy.....             | 7  |
| Electron paramagnetic resonance..... | 7  |
| X-ray structure determination.....   | 8  |
| Thermogravimetric analysis.....      | 13 |
| BET and Sorption experiments.....    | 13 |
| Monte Carlo Integration.....         | 20 |
| References.....                      | 21 |

## Experimental

### General methods

Copper(II) acetate dihydrate was synthesized from Sigma-Aldrich (Merk©) copper(II) sulfate pentahydrate and purified by recrystallization in water. 1,2,3-triazole-4,5-dicarboxylic acid (**H<sub>3</sub>L**) was synthesized according to reference (1). DMF 99% was used without any previous treatment. N,N'-dimethylaniline was purchased from Sigma-Aldrich (Merk©) and used as received.

Elemental analyses (C, H, N) were performed on an Elementar MicroVario Cube analyzer. Melting points were measured in glass capillary tubes on a Büchi B-540 melting point apparatus. FT-IR spectra were recorded on a Bruker ALPHA FTIR spectrometer using the ATR technique with a diamond window in the range of  $\tilde{\nu}$  400–4000  $\text{cm}^{-1}$ . TGA measurements were carried on a Netzsch STA 449 F3 Jupiter with a heating rate of 10  $^{\circ}\text{C}/\text{min}$  from room temperature to 450  $^{\circ}\text{C}$  under nitrogen atmosphere. Powder X-ray diffraction patterns were measured on a Bruker D8 Advance X-ray diffractometer equipped with a LynxEye detector using  $\text{CuK}\alpha$  radiation ( $\lambda = 1.5406 \text{ \AA}$ ; monochromator: germanium) in a range 2-theta of 4–60 $^{\circ}$  with a step of 0.01 $^{\circ}$ . The UV-visible spectra were recorded on a Thermo Scientific Genesys 10 spectrophotometer in range of 10000–25000  $\text{cm}^{-1}$ . The paramagnetic resonance spectrum was measured in x-band in an EPR spectrometer Jeol, JES-TE300, in solid at room temperature. HRMS spectrum was measured on a Bruker micro-TOF II spectrometer using ESI ionization.

### Synthesis of UNAM-1

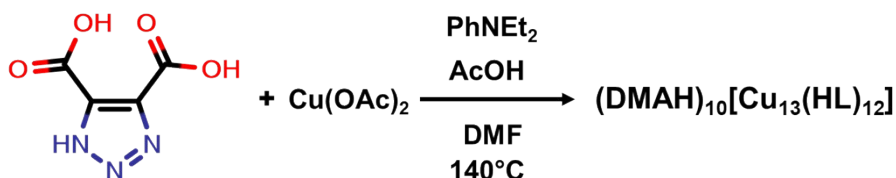

**(DMAH)<sub>10</sub>[Cu<sub>13</sub>(HL)<sub>12</sub>] (UNAM-1)**. A mixture of  $\text{Cu}(\text{OAc})_2 \cdot \text{H}_2\text{O}$  (0.0119 g, 0.06 mmol), **H<sub>3</sub>L** (0.0116 g, 0.06 mmol),<sup>1</sup> DMF (2.0 mL), N,N'-dimethylaniline (0.0119 g, 0.08 mmol) and acetic acid (0.0048 g, 0.08 mmol) was heated at 140  $^{\circ}\text{C}$  for 72 h in a 4 mL borosilicate glass vial. After this time, the reaction mixture was cooled to room temperature at a rate of 0.6  $^{\circ}\text{C} \text{ min}^{-1}$ , the crystalline product was washed thoroughly with DMF and dried at 70  $^{\circ}\text{C}$  under vacuum yielding purple cubic shape crystals, (0.0107 g). Yield: 68 %  $(\text{DMAH})_{10}[\text{Cu}_{13}(\text{HL})_{12}] \cdot 7.5\text{DMF} \cdot 7\text{H}_2\text{O}$ ,  $\text{C}_{90.5}\text{H}_{158.5}\text{N}_{53.5}\text{O}_{62.5}\text{Cu}_{13}$ . Elemental Analysis (%) Calc. C 28.44%, H 4.18%, N 19.61%; Found: C 28.72%, H 4.02%, N 19.35%. Decomp. point 360  $^{\circ}\text{C}$ . IR-Spectroscopy: 3433(w), 3052(w), 2799(w), 2481(w), 1657(s), 1578(s), 1504(s), 1465(s), 1367(s), 1287(m), 1254(m), 1208(m), 1156(m), 1095(m), 1060(m), 1020(m), 973(m), 837(m), 782(m), 699(w), 663(m), 534(m), 421(w) (See Fig. S1 for full IR spectrum).

## Infrared spectroscopy

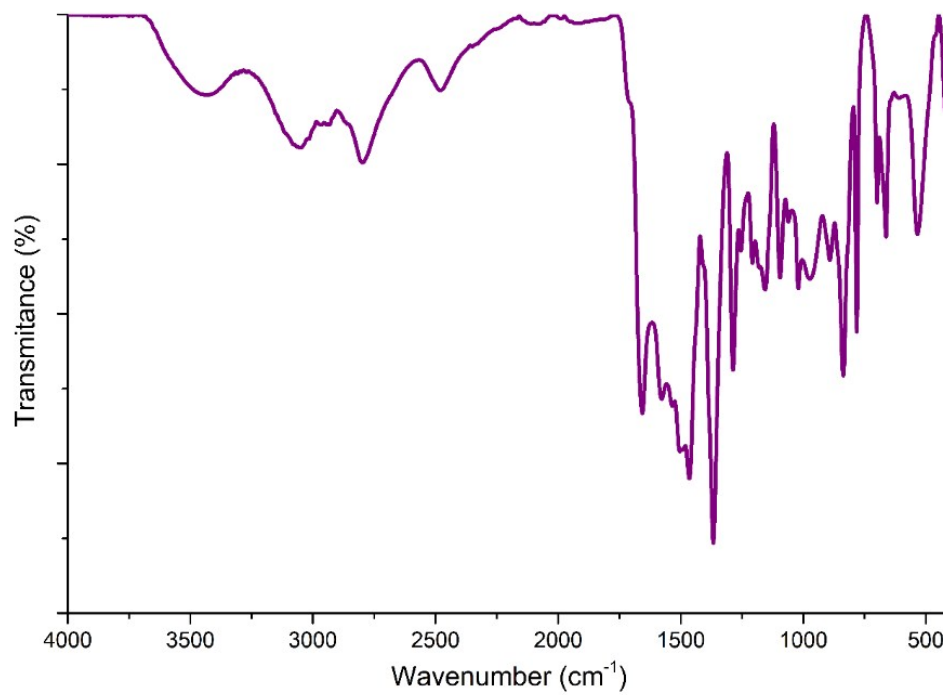

Figure S1. The ATR-FT-IR spectrum of UNAM-1.

## Mass spectrometry

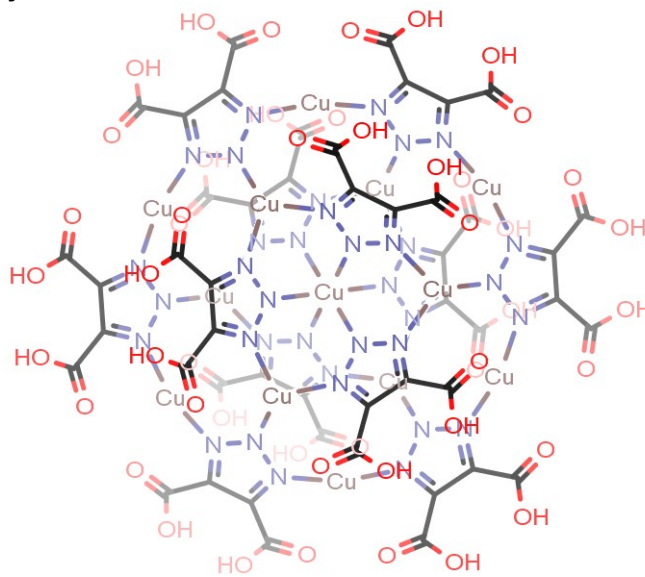

Figure S2. The [Cu<sub>13</sub>(H<sub>2</sub>L)<sub>12</sub>]<sup>2+</sup> ion observed in the mass spectrum of UNAM-1.

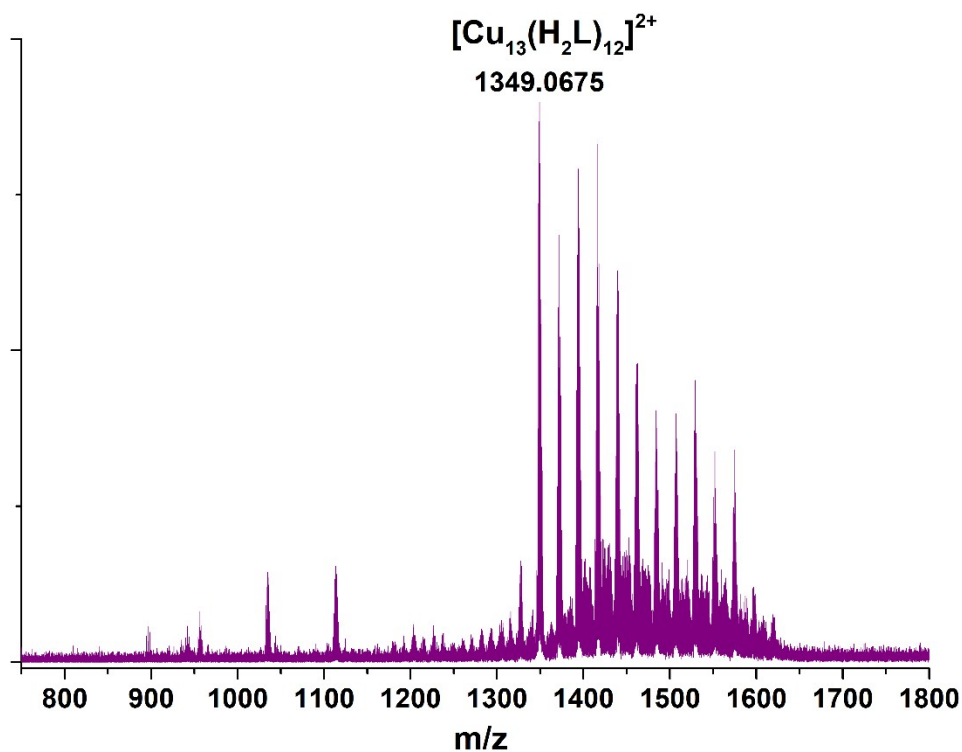

**Figure S3.** ESI-TOF(+) mass spectrum of UNAM-1.

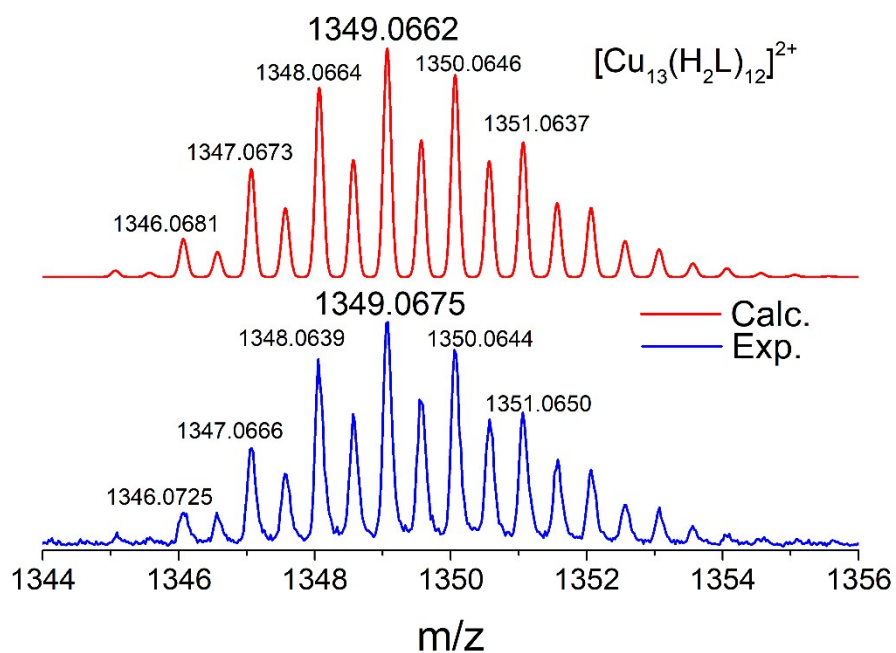

**Figure S4.** Calculated (above) vs. experimental isotopic patterns (below) for  $[\text{Cu}_{13}(\text{H}_2\text{L})_{12}]^{2+}$ . Formula:  $\text{C}_{48}\text{H}_{24}\text{N}_{36}\text{O}_{48}\text{Cu}_{13}$ ; Error = 0.96 ppm.

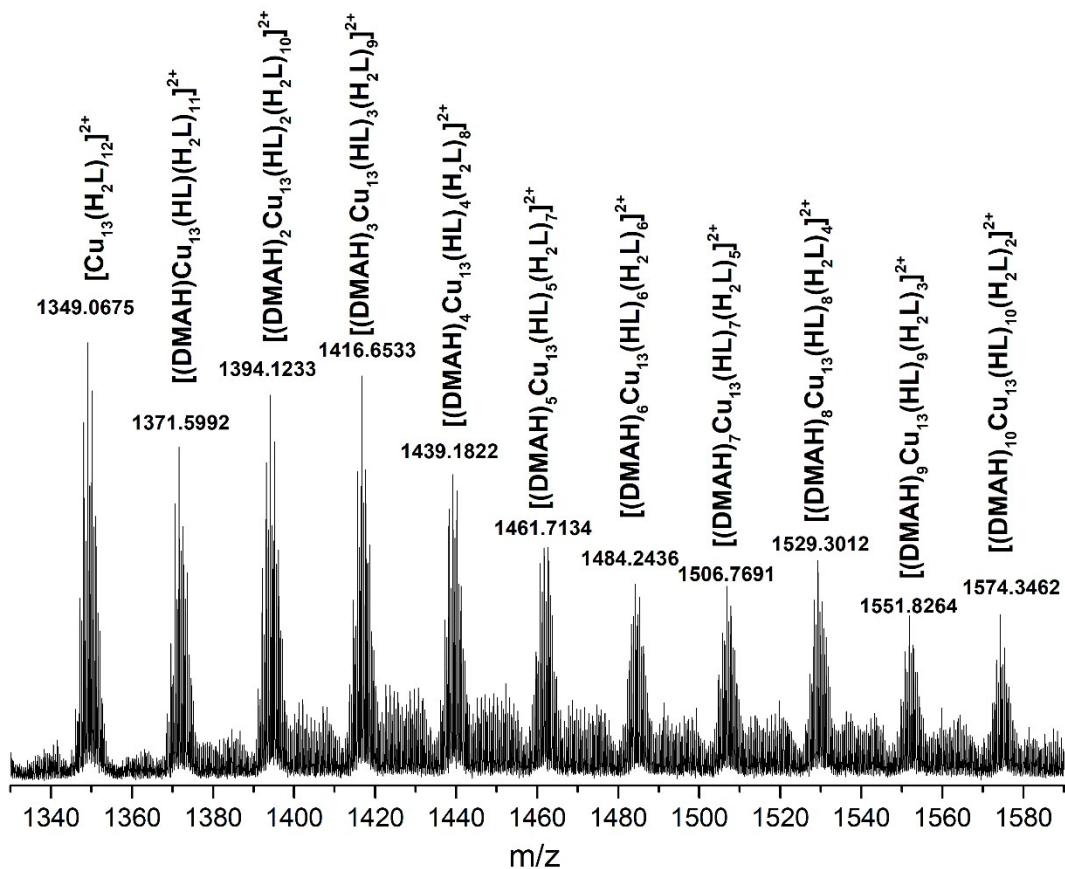

Figure S5. Ionic species found in the mass spectrum ESI-TOF(+) of UNAM-1.

Table S1. Different ionic species identified in the ESI-TOF(+) mass spectrum of UNAM-1.

| Formula moiety                                                                  | Formula sum                                                          | Calculated | Experimental | Error (ppm) |
|---------------------------------------------------------------------------------|----------------------------------------------------------------------|------------|--------------|-------------|
| $[\text{Cu}_{13}\text{H}_{12}(\text{H}_2\text{L})_{12}]^{2+}$                   | $\text{C}_{48}\text{H}_{24}\text{N}_{36}\text{O}_{48}\text{Cu}_{13}$ | 1349.0662  | 1349.0675    | 0.96        |
| $[(\text{DMAH})\text{Cu}_{13}(\text{HL})(\text{H}_2\text{L})_{11}]^{2+}$        | $\text{C}_{50}\text{H}_{31}\text{N}_{37}\text{O}_{48}\text{Cu}_{13}$ | 1371.5951  | 1371.5992    | 2.99        |
| $[(\text{DMAH})_2\text{Cu}_{13}(\text{HL})_2(\text{H}_2\text{L})_{10}]^{2+}$    | $\text{C}_{52}\text{H}_{38}\text{N}_{38}\text{O}_{48}\text{Cu}_{13}$ | 1394.1241  | 1394.1233    | -0.57       |
| $[(\text{DMAH})_3\text{Cu}_{13}(\text{HL})_3(\text{H}_2\text{L})_9]^{2+}$       | $\text{C}_{54}\text{H}_{45}\text{N}_{39}\text{O}_{48}\text{Cu}_{13}$ | 1416.6531  | 1416.6533    | 0.14        |
| $[(\text{DMAH})_4\text{Cu}_{13}(\text{HL})_4(\text{H}_2\text{L})_8]^{2+}$       | $\text{C}_{56}\text{H}_{52}\text{N}_{40}\text{O}_{48}\text{Cu}_{13}$ | 1439.1820  | 1439.1822    | 0.14        |
| $[(\text{DMAH})_5\text{Cu}_{13}(\text{HL})_5(\text{H}_2\text{L})_7]^{2+}$       | $\text{C}_{58}\text{H}_{59}\text{N}_{41}\text{O}_{48}\text{Cu}_{13}$ | 1461.7110  | 1461.7134    | 1.64        |
| $[(\text{DMAH})_6\text{Cu}_{13}(\text{HL})_6(\text{H}_2\text{L})_6]^{2+}$       | $\text{C}_{60}\text{H}_{66}\text{N}_{42}\text{O}_{48}\text{Cu}_{13}$ | 1484.2400  | 1484.2436    | 2.43        |
| $[(\text{DMAH})_7\text{Cu}_{13}(\text{HL})_7(\text{H}_2\text{L})_5]^{2+}$       | $\text{C}_{62}\text{H}_{73}\text{N}_{43}\text{O}_{48}\text{Cu}_{13}$ | 1506.7689  | 1506.7691    | 0.13        |
| $[(\text{DMAH})_8\text{Cu}_{13}(\text{HL})_8(\text{H}_2\text{L})_4]^{2+}$       | $\text{C}_{64}\text{H}_{80}\text{N}_{44}\text{O}_{48}\text{Cu}_{13}$ | 1529.2979  | 1529.3012    | 2.16        |
| $[(\text{DMAH})_9\text{Cu}_{13}(\text{HL})_9(\text{H}_2\text{L})_3]^{2+}$       | $\text{C}_{66}\text{H}_{87}\text{N}_{45}\text{O}_{48}\text{Cu}_{13}$ | 1551.8268  | 1551.8264    | -0.26       |
| $[(\text{DMAH})_{10}\text{Cu}_{13}(\text{HL})_{10}(\text{H}_2\text{L})_2]^{2+}$ | $\text{C}_{68}\text{H}_{94}\text{N}_{46}\text{O}_{48}\text{Cu}_{13}$ | 1574.3558  | 1574.3462    | -6.10       |

## UV-Vis Spectroscopy

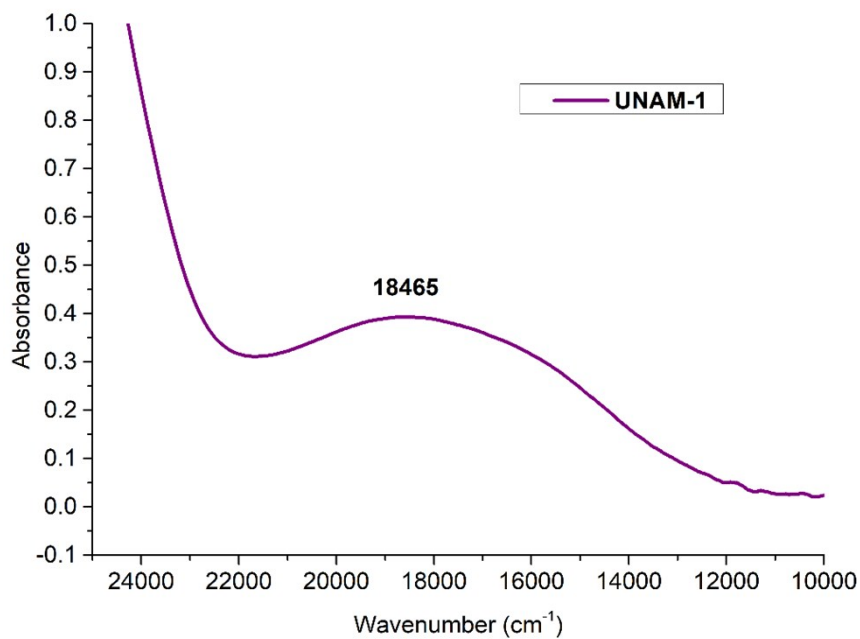

**Figure S6.** The UV-Vis spectrum of **UNAM-1**. A single transition  ${}^2E_g \leftarrow {}^2T_g$  for the central octahedral  $\text{Cu}^{\text{II}}$  ion can be seen at  $18,465 \text{ cm}^{-1}$ .

## Electron paramagnetic resonance

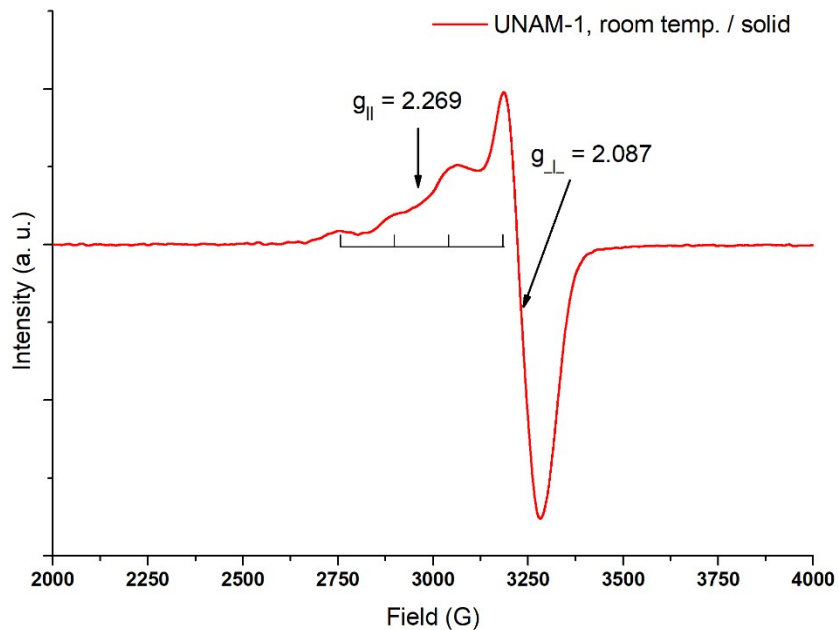

**Figure S7.** X-band EPR spectrum of **UNAM-1** in solid state at room temperature.

## X-ray structure determination

**Table S2.** Data collection and refinement details for **UNAM-1**

|                                                                                                       | <b>UNAM-1</b>                                                                                                                    |
|-------------------------------------------------------------------------------------------------------|----------------------------------------------------------------------------------------------------------------------------------|
| Empirical formula                                                                                     | C <sub>68</sub> H <sub>92</sub> Cu <sub>13</sub> N <sub>46</sub> O <sub>48</sub> + solvent                                       |
| Moiety formula                                                                                        | C <sub>48</sub> H <sub>12</sub> Cu <sub>13</sub> N <sub>36</sub> O <sub>48</sub> , 10(C <sub>2</sub> H <sub>8</sub> N) + solvent |
| Molecular weight                                                                                      | 3147.89                                                                                                                          |
| Color                                                                                                 | Purple                                                                                                                           |
| Crystal system                                                                                        | Cubic                                                                                                                            |
| Space group                                                                                           | <i>Im</i> $\bar{3}$ <i>m</i>                                                                                                     |
| Temp (K)                                                                                              | 296(2)                                                                                                                           |
| $\lambda$ , (Å)                                                                                       | 1.54178                                                                                                                          |
| <i>a</i> (Å)                                                                                          | 32.3206(2)                                                                                                                       |
| <i>b</i> (Å)                                                                                          | 32.3206(2)                                                                                                                       |
| <i>c</i> (Å)                                                                                          | 32.3206(2)                                                                                                                       |
| $\alpha$ (deg)                                                                                        | 90                                                                                                                               |
| $\beta$ (deg)                                                                                         | 90                                                                                                                               |
| $\gamma$ (deg)                                                                                        | 90                                                                                                                               |
| <i>V</i> (Å <sup>3</sup> )                                                                            | 33762.8(6)                                                                                                                       |
| <i>Z</i>                                                                                              | 8                                                                                                                                |
| $\rho_{calc}$ (Mg m <sup>-3</sup> )                                                                   | 1.239                                                                                                                            |
| $\mu$ (mm <sup>-1</sup> )                                                                             | 2.366                                                                                                                            |
| <i>F</i> (000)                                                                                        | 12664                                                                                                                            |
| Crystal size (mm)                                                                                     | 0.282 x 0.266 x 0.256                                                                                                            |
| $\theta$ range (deg)                                                                                  | 1.933–68.324                                                                                                                     |
| Index ranges                                                                                          | –32 ≤ <i>h</i> ≤ 38<br>–38 ≤ <i>k</i> ≤ 29<br>–30 ≤ <i>l</i> ≤ 36                                                                |
| Reflections collected                                                                                 | 48512                                                                                                                            |
| Independent reflections ( <i>R</i> <sub>int</sub> )                                                   | 2953 (0.0493)                                                                                                                    |
| data/restraints/parameters                                                                            | 2953 / 448 / 290                                                                                                                 |
| GoF on <i>F</i> <sup>2</sup>                                                                          | 1.039                                                                                                                            |
| <i>R</i> <sub>1</sub> , <sup>a</sup> <i>wR</i> <sub>2</sub> <sup>b</sup> ( <i>I</i> > 2σ( <i>I</i> )) | 0.0592, 0.1831                                                                                                                   |
| <i>R</i> <sub>1</sub> , <sup>a</sup> <i>wR</i> <sub>2</sub> <sup>b</sup> (all data)                   | 0.0659, 0.1957                                                                                                                   |
| Voids in the unit cell (volume in Å <sup>3</sup> / electrons):                                        | 9292 / 2244                                                                                                                      |
| Largest diff. peak / hole (e Å <sup>-3</sup> )                                                        | 0.629 / –0.489                                                                                                                   |
| CCDC                                                                                                  | 1941697                                                                                                                          |

<sup>a</sup>  $R_1 = \sum ||F_o| - |F_c|| / \sum |F_o|$ . <sup>b</sup>  $wR_2 = [\sum w(F_o^2 - F_c^2)^2 / \sum (F_o^2)^2]^{1/2}$ .

Single crystals of UNAM-1 was mounted inside a capillary and was covered with a drop of the mother liquor and placed inside a Bruker APEX DUO diffractometer equipped with an Apex II CCD detector using CuK $\alpha$  ( $\lambda = 1.54178$  Å) Incoatec I $\mu$ S microsource and multilayer optic monochromator. Frames were collected using omega scans and integrated with SAINT.<sup>2</sup> Multi-scan absorption correction (SADABS) was applied.<sup>2</sup> The structures were solved by direct methods (SHELXT)<sup>3</sup> and refined using full-matrix least-squares on *F*<sup>2</sup> with SHELXL<sup>4</sup> within the ShelXle GUI.<sup>5</sup> Weighted *R* factors, *wR*, and all goodness-of-fit indicators are based on *F*<sup>2</sup>. All non-



hydrogen atoms were refined anisotropically. The hydrogen atoms of the C–H, N–H and O–H bonds were placed in idealized positions. The disordered groups and cations were refined using geometry (SAME/SADI, DFIX, and FLAT) and  $U_{ij}$  restraints (SIMU, RIGU, ISOR) implemented in SHELXL.<sup>4</sup> The molecular graphics were prepared using Diamond,<sup>6</sup> Mercury,<sup>7</sup> POV-RAY,<sup>8</sup> Corel Draw X7<sup>9</sup> and GIMP.<sup>10</sup> CCDC-1941697 (**UNAM-1**) contains the supplementary crystallographic data for this paper. These data can be obtained free of charge via <http://www.ccdc.cam.ac.uk/const/retrieving.html> (or from the Cambridge Crystallographic Data Centre, 12 Union Road, Cambridge CB21EZ, UK; fax: (+44)1223-336-033; or [deposit@ccdc.cam.ac.uk](mailto:deposit@ccdc.cam.ac.uk)).

**Table S3.** Selected bond lengths [Å] and angles [°] for **UNAM-1**

|            |            |
|------------|------------|
| Cu3–N1     | 2.157 (3)  |
| Cu1–N2     | 1.980 (3)  |
| Cu1–N4     | 1.921 (9)  |
| Cu2–N3     | 1.93(3)    |
| Cu2–N3     | 1.93(3)    |
| N1–Cu3–N1a | 90.07 (13) |
| N2–Cu1–N2b | 99.01 (12) |
| N2–Cu1–N4  | 129.8 (3)  |
| N3–Cu2–N3  | 43.45 (19) |

**a:** z, x, y; **b:** x, z, y

**Table S4.** Hydrogen bonds within the crystalline structure of **UNAM-1**

| Atoms           | D...A (Å)  | H...A (Å) | Ang. D–H...A (°) |
|-----------------|------------|-----------|------------------|
| N1Bh–H1B1h...O1 | 2.787 (14) | 1.97      | 153              |
| N1Db–H1D2b...O3 | 2.868 (14) | 1.99      | 169              |
| N1Dg–H1D2g...O5 | 2.809 (10) | 1.99      | 152              |
| O2–H2...O2f     | 2.446 (6)  | 1.64      | 168              |
| O3–H2...O5      | 2.568 (8)  | 1.79      | 158              |

**b:** x, z, y; **f:** z, y, x; **g:** x, y, –z; **h:** 0.5–y, 0.5–x, 0.5–z;

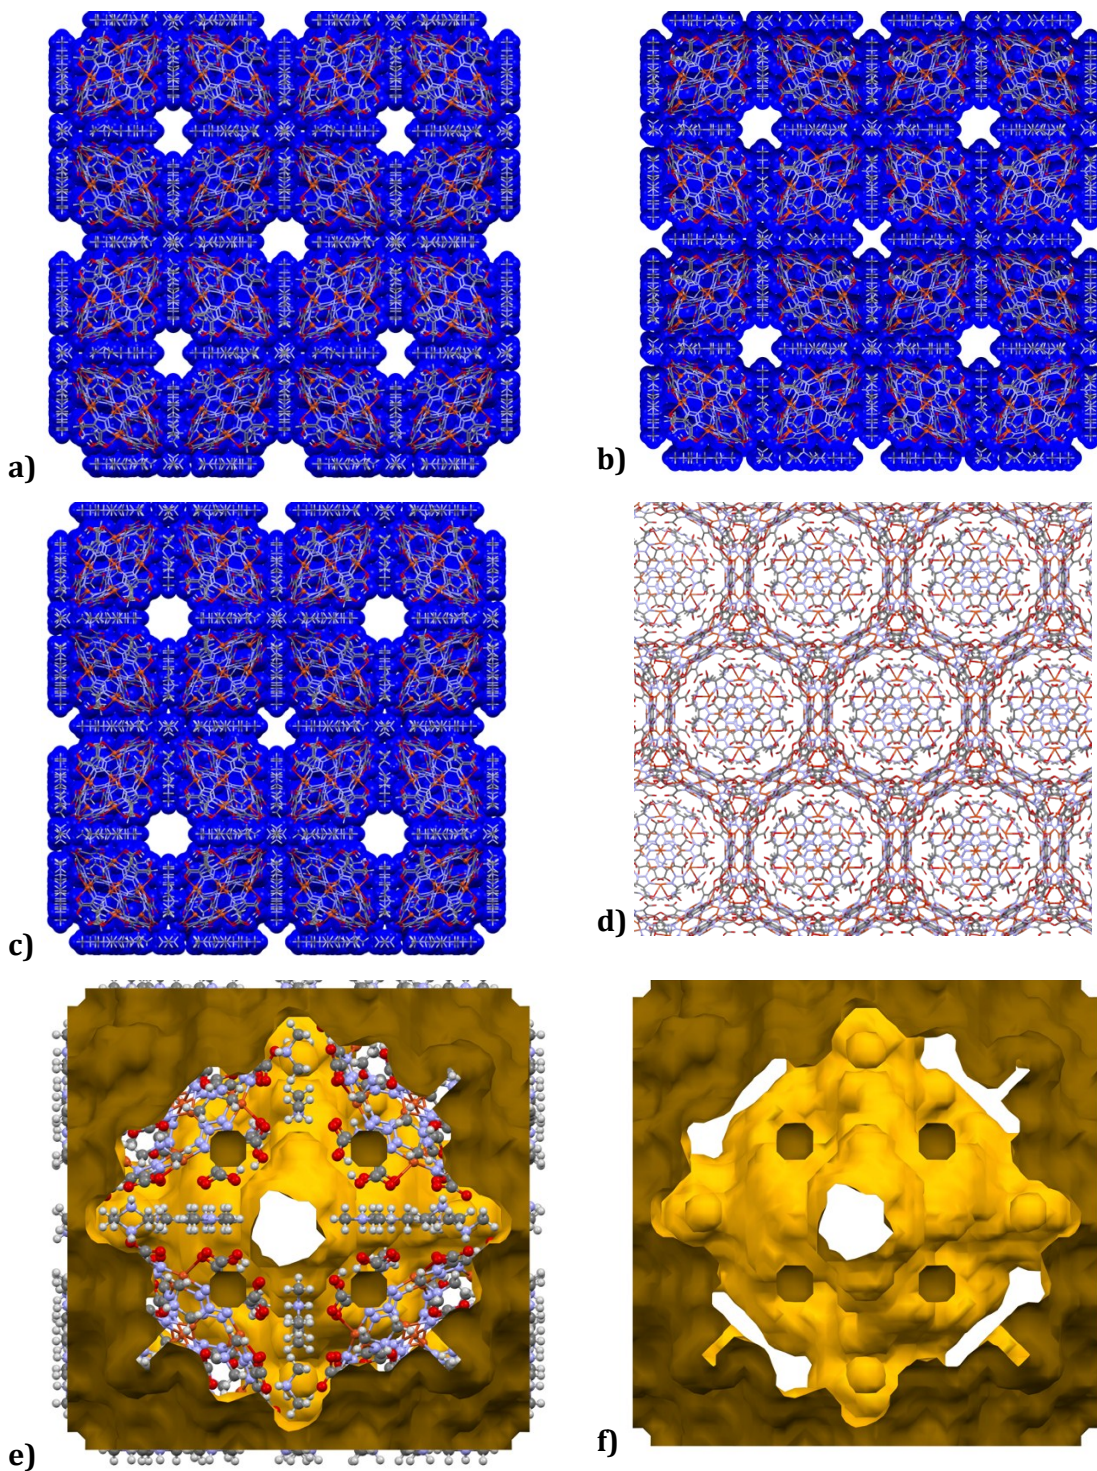

**Figure S8.** (a–c) Space-filling representation of the resulting framework with the location of the channel openings. For these figures, the structure of UNAM-1 was expanded to P1 and the positions of the disordered dimethylammonium cations were selected (from the refined positions) so all possible channel windows would be visible within the a, b, c sides of the unit cell. d) 111 direction view on the packing in UNAM-1. (e–f) Size and shape of the voids present in the centre and corners of the unit cells with (e) and without (f) the ions. Outside (yellow) and inside (brown) surface of the cavity.

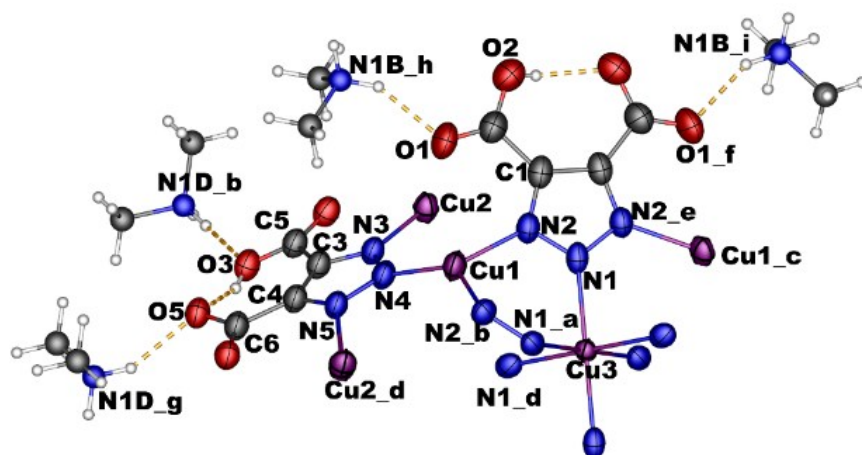

**Figure S9.** Asymmetric unit of **UNAM-1**. Thermal ellipsoids for the main anion are at 50% probability. Dimethylammonium cations are represented as ball and sticks. Hydrogen bonds are depicted as dashed yellow bonds.

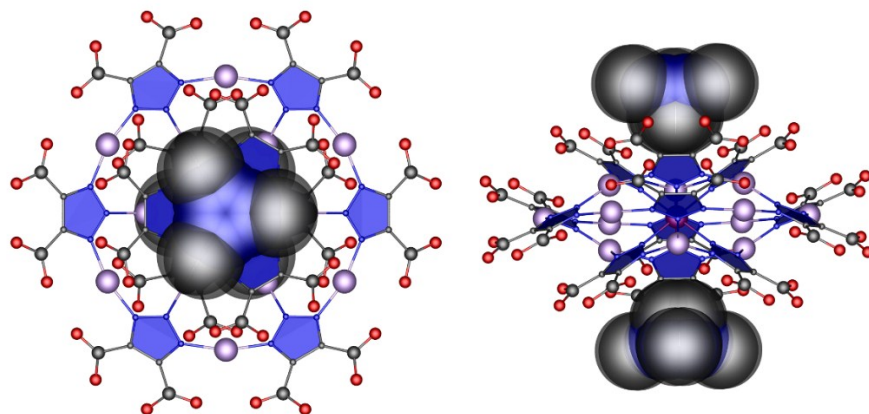

**Figure S10.** DMAH ions with 0.5 occupancy hosted in the axial positions of the  $[\text{Cu}_{13}(\text{HL})_{12}]^{10-}$  anion of **UNAM-1**.

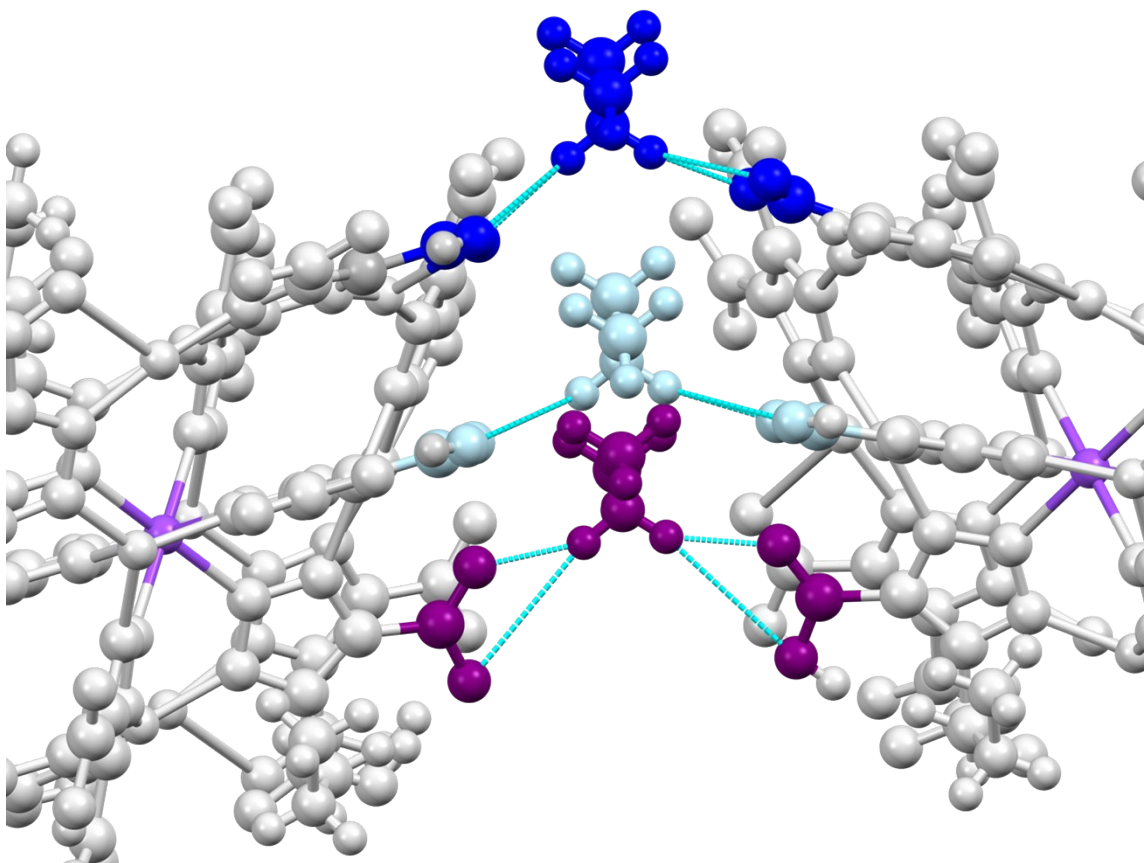

**Figure S11.** Example of a hydrogen bonds between two  $[\text{Cu}_{13}(\text{HL})_{12}]^{10-}$  anions and dimethylammonium cations in **UNAM-1**.



## Thermogravimetric analysis

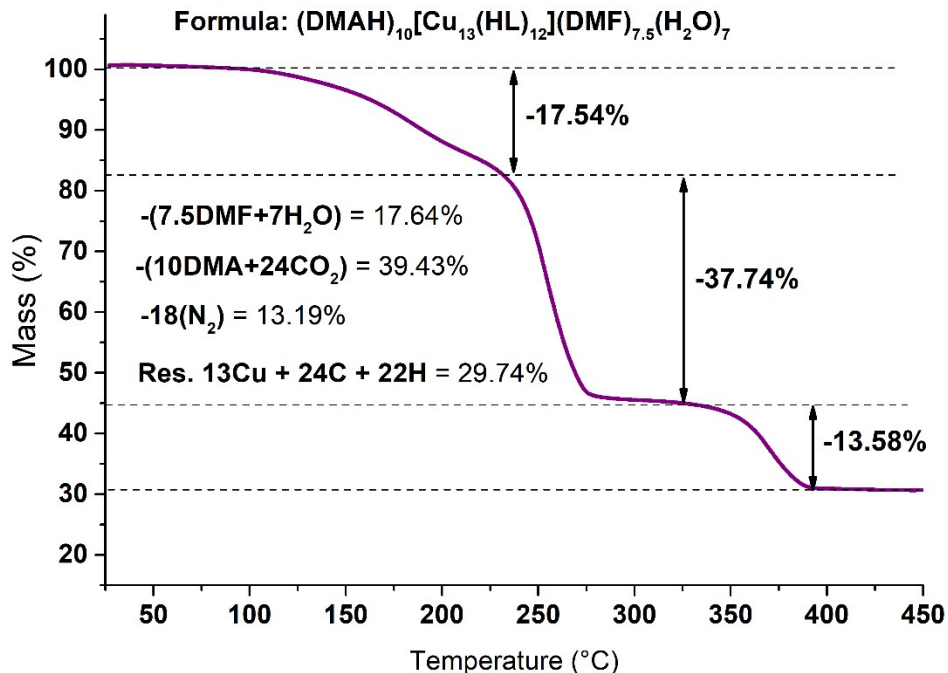

Figure S12. Thermogram of UNAM-1.

## BET and Sorption experiments

Microstructural features were obtained from  $N_2$  adsorption/desorption isotherm at  $-196^\circ C$  in a Quantachrome Autosorb MP-1 equipment. Before the measurement, the sample (0.050 g) was degasified under vacuum at  $70^\circ C$  during 1 h. The Brunauer–Emmett–Teller (BET) method was used for calculation of the specific surface area.

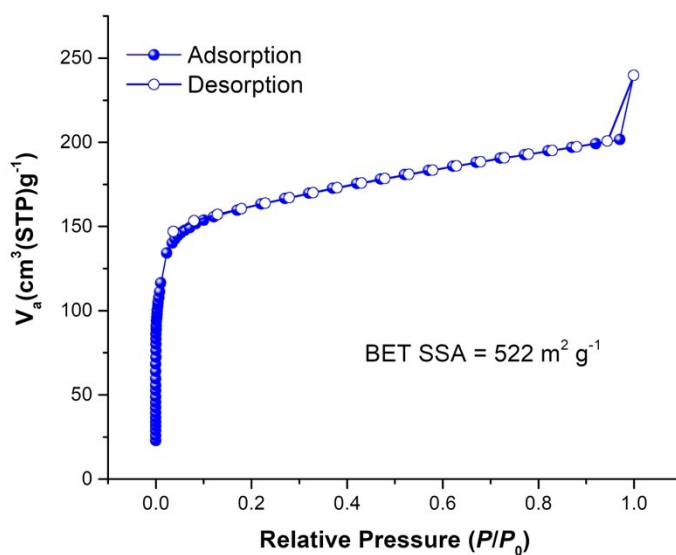

Figure S13.  $N_2$  sorption isotherm of UNAM-1 activated at  $70^\circ C$  and collected at 77 K.

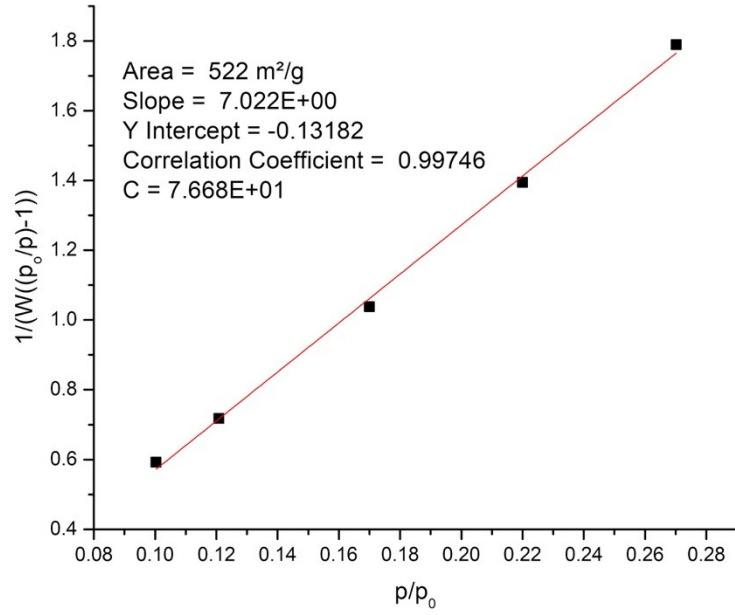

**Figure S14.** Plot of the linear region for the BET equation (from the N<sub>2</sub> adsorption isotherm of **UNAM-1** activated at 70 °C).

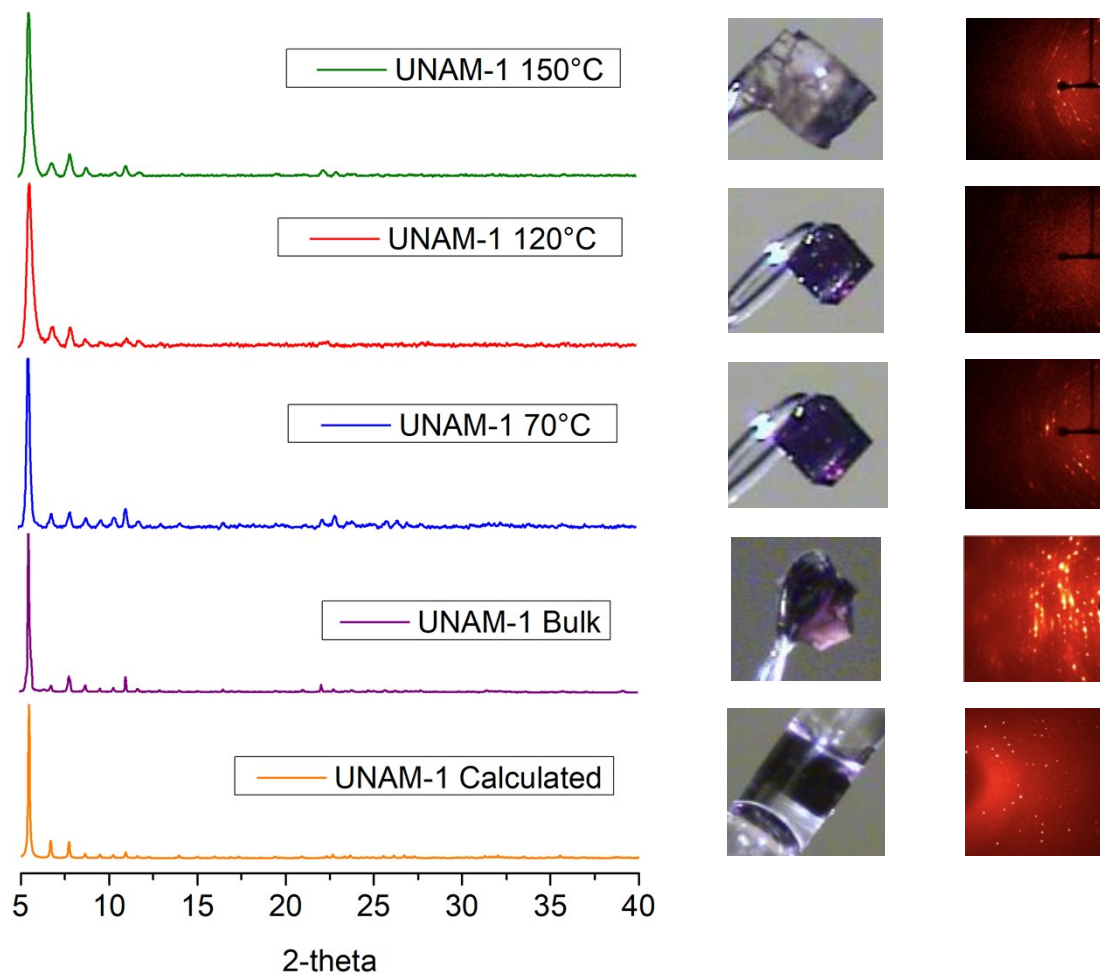

**Figure S15.** The effect of the activation temperature on the integrity of **UNAM-1** crystals. Left column Powder DRX, middle column: photo of a crystal, right column: 2D diffraction pattern of the crystal.

At 70 °C, the crystal maintains its integrity and a diffraction power. At 120 °C, the crystal as whole maintains integrity, but loses internal periodicity as evidenced by 2D single crystal X-ray diffraction and lower intensity of the powder X-Ray diffraction. At 150 °C the crystal shows severe cracks but regains diffractive power in both powder and monocrystal X-Ray diffraction. The powder diffractograms at 70 and 150 °C point to a phase retention, and the cracking of the crystal is most probably the result of the expansion of the DMF vapour pressure inside the crystal at 150 °C and the small window size of the pore that does not allow an efficient release of the solvent from the crystal.

For SO<sub>2</sub> sorption, the sample was activated at 70 °C under vacuum ( $1 \cdot 10^{-6}$  bar) for 60 min. SO<sub>2</sub> adsorption was carried out at 298 K up to 1 bar in a Dynamic Gravimetric Gas/Vapour Sorption Analyser, DVS vacuum (Surface Measurement Systems Ltd).

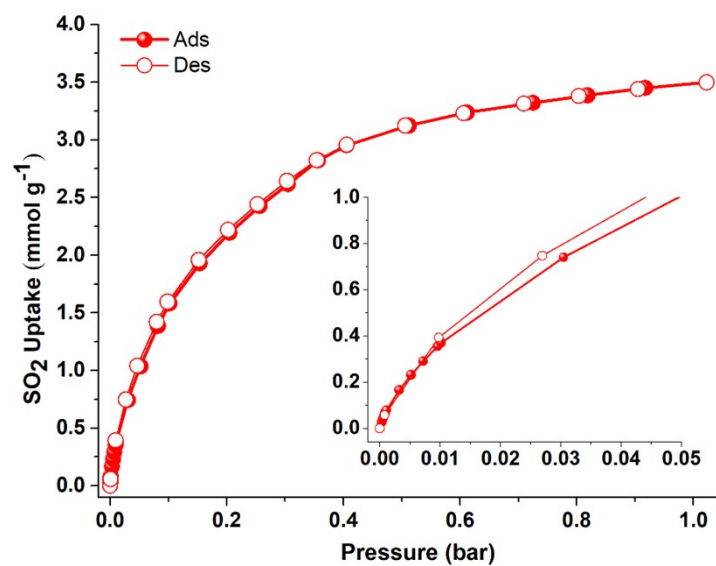

Figure S16. SO<sub>2</sub> sorption isotherm of UNAM-1 activated at 70 °C.

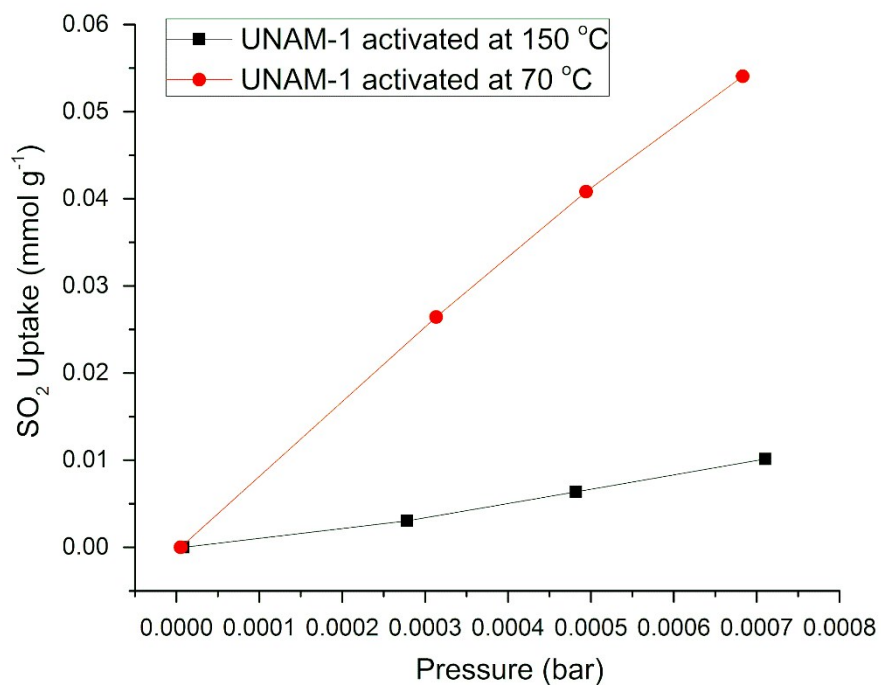

Figure S17. SO<sub>2</sub> adsorption isotherms of UNAM-1 activated at 70 °C and 150 °C.



### Isosteric Heat of Adsorption for SO<sub>2</sub>

The isosteric heat of adsorption was estimated by fitting virial-type equation to 303 and 308 K SO<sub>2</sub> adsorption isotherms (Figure S21).

$$\ln\left(\frac{n}{p}\right) = A_0 + A_1n + A_2n^2 + \dots \quad \text{Eq. 1}$$

where  $p$  is the pressure,  $n$  is the amount adsorbed and  $A_0, A_1, \dots$  are the virial coefficients ( $A_2$  and higher terms can be ignored at lower coverage values). A plot of  $\ln(n/p)$  versus  $n$  should give a straight line at low surface coverage (Figure S22). The heat of adsorption was estimated in  $-17.52 \text{ kJ mol}^{-1}$ .

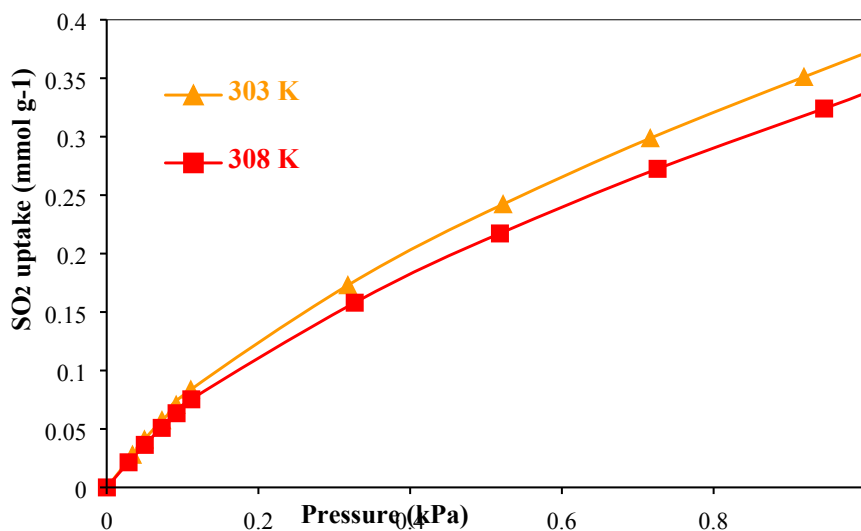

Figure S18. SO<sub>2</sub> adsorption isotherms of UNAM-1 at 303 and 308 K at low pressures.

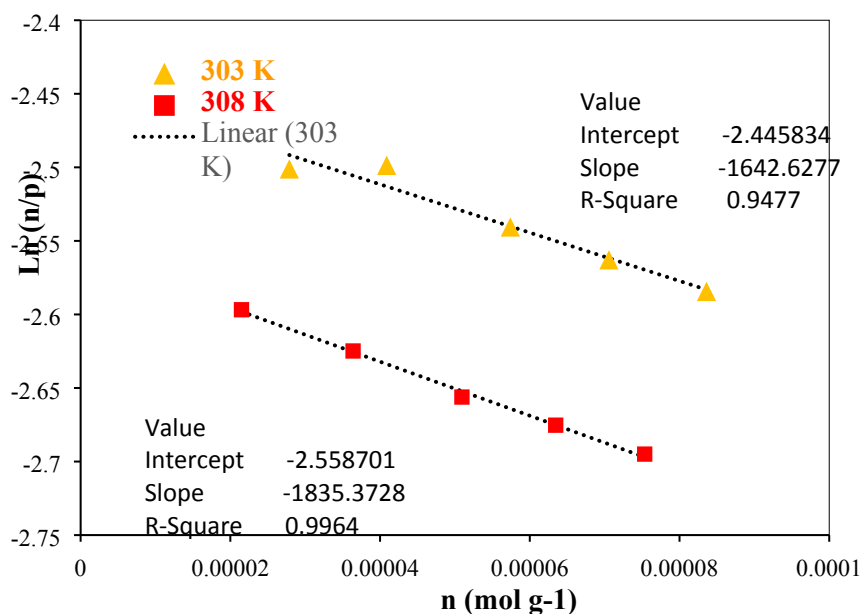

Figure S19. Virial fitting plots for adsorption of SO<sub>2</sub> on UNAM-1 at 303 and 308 K.

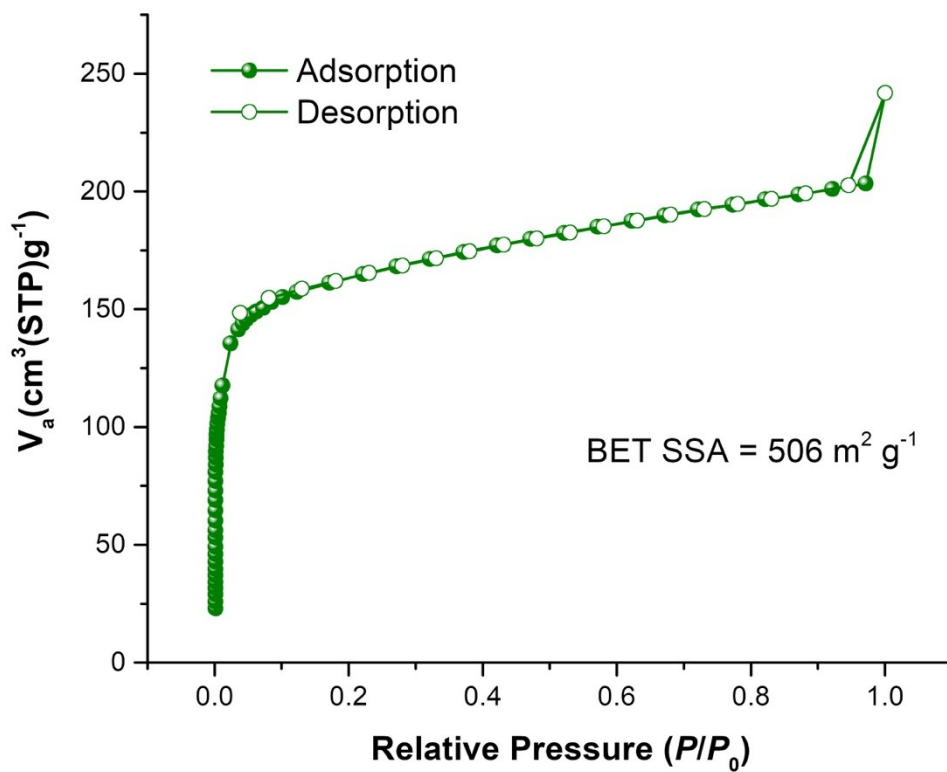

**Figure S20.** N<sub>2</sub> sorption isotherm of **UNAM-1** activated at 120 °C and collected at 77 K.

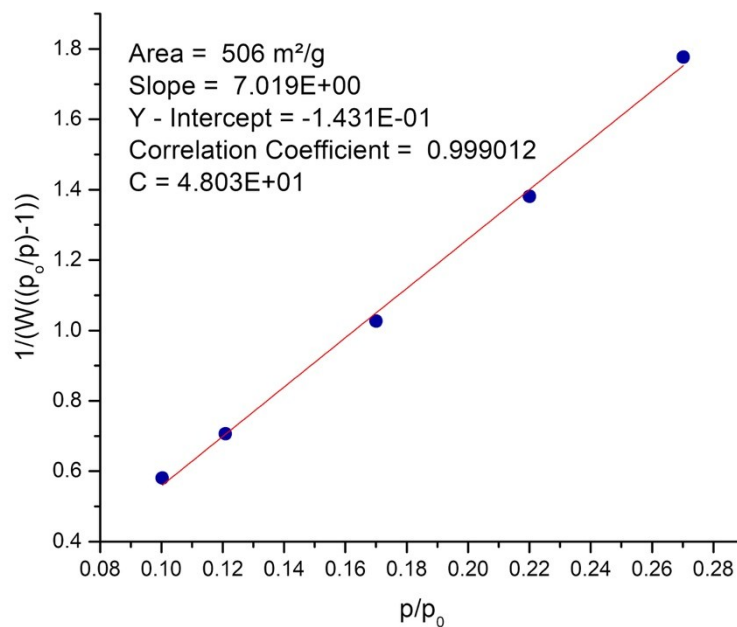

**Figure S21.** Plot of the linear region for the BET equation (from the N<sub>2</sub> adsorption isotherm of UNAM-1 activated at 120 °C).

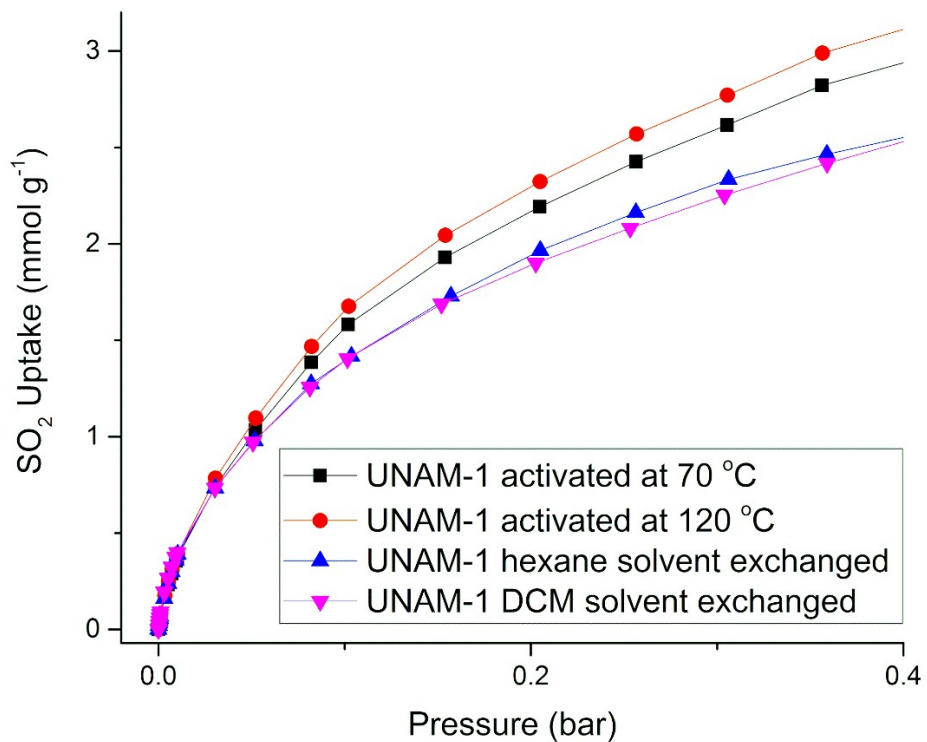

**Figure S22.** Experimental  $\text{SO}_2$  adsorption isotherms (at 35 °C and up to 1 bar) collected for activated **UNAM-1** at 70 °C, activated **UNAM-1** at 120 °C, hexane-solvent exchanged **UNAM-1** (activated at 70 °C) and DCM-solvent exchanged **UNAM-1** (activated at 70 °C) samples.

**Table S5.** Comparison of SO<sub>2</sub> adsorption capacity of **UNAM-1** with some MOFs.

| Material                | S <sub>BET</sub> (m <sup>2</sup> ·g <sup>-1</sup> ) | SO <sub>2</sub> uptake (mmol·g <sup>-1</sup> ) | Pressure (bar)             | Temperature (K)            | Ref.      |
|-------------------------|-----------------------------------------------------|------------------------------------------------|----------------------------|----------------------------|-----------|
| <b>UNAM-1</b>           | 522                                                 | 3.5                                            | 1                          | 298                        | This work |
|                         | 522                                                 | 1.58                                           | 0.1                        | 298                        |           |
| SIFSIX-3-Zn             | 250                                                 | 2.1                                            | 1                          | 298                        | 11        |
| SIFSIX-3-Ni             | 368                                                 | 2.74                                           | 1                          | 298                        | 11        |
| FMOF-2                  | 378                                                 | 1.79                                           | Dynamic sorption           | 298                        | 12        |
| Zn-MOF-74               | 632                                                 | 3.03                                           |                            | Dynamic sorption           | 298       |
| ZnCo analogues          | 700                                                 | 1.68                                           | 1                          | 298                        | 14        |
| ELM-12                  | 706                                                 | 2.5                                            | 1                          | 298                        | 15        |
| MIF zeolite             | 713                                                 | 2.6                                            | 1                          | 298                        | 16        |
| Mg-MOF-74               | 1206                                                | 1.56                                           | Dynamic sorption           | 298                        | 17        |
| Zn-MOF-74               | 496                                                 | 0.256                                          |                            | Dynamic sorption           | 298       |
| MFM-305-CH <sub>3</sub> | 256                                                 | 5.16                                           | 1                          | 298                        | 18        |
| MFM-305                 | 779                                                 | 6.99                                           | 1                          | 298                        | 18        |
| MIL-160                 | 1170                                                | 4.2                                            | 0.01                       | 293                        | 19        |
| CAU-10                  | 625                                                 | 4.47                                           | 1                          | 298                        | -         |
| UiO-66-ox               | 1410                                                | 0.8                                            | <0.1                       | 298                        | 20        |
| HKUST-1                 | 1264                                                | 0.49                                           | Dynamic sorption           | 298                        | 13        |
| KAUST-7                 | 280                                                 | 1.4                                            |                            | 500 ppm of SO <sub>2</sub> | 298       |
| KAUST-8                 | 258                                                 | 1.6                                            | 500 ppm of SO <sub>2</sub> | 298                        | 21        |

## Monte Carlo Integration

### Experimental

The accessible surface areas<sup>22, section 1.5</sup> were calculated from a simple Monte Carlo integration technique where the probe molecule is “rolled” over the framework surface. For this, a probe molecule was randomly inserted around each of the framework atoms in turn and checked for overlap with other framework atoms. The fraction of the probe molecules that did not overlap with other framework atoms was then used to calculate the accessible surface area. The FORTRAN source code to do simulation was downloaded from the Tina Düren Research Group website.<sup>23</sup> The diameters of the framework atoms were taken from the UFF force field (Table S6). We use 10 000 insertions of nitrogen probe with a diameter of 3.681 Å.<sup>24</sup>

**Table S6:** Diameter of framework atoms taken as  $\sigma$  Lennard-Jones parameter of Universal Force Field.<sup>25</sup>

| Atom | $\sigma, \text{\AA}$ |
|------|----------------------|
| H    | 2.571                |
| C    | 3.431                |
| N    | 3.261                |
| O    | 3.118                |
| Cu   | 3.114                |

The calculated geometric surface area (Table S7) is bigger than the experimental BET surface area ( $522 \text{ m}^2\cdot\text{g}^{-1}$ ) suggesting that the pores are partially blocked by solvent molecules that did not evolve during the degassing process.

**Table S7:** Surface area calculated from crystal structure rolling nitrogen over framework surface.

| Parameter                          | value                                   |
|------------------------------------|-----------------------------------------|
| Accessible surface area            | $3197.24 \text{ \AA}^2$                 |
| Accessible surface area per volume | $946.97 \text{ m}^2\cdot\text{cm}^{-3}$ |
| Accessible surface area per mass   | $764.30 \text{ m}^2\cdot\text{g}^{-1}$  |

## References

1. G. H. Suverkropp, P. L. Alsters, C. S. Snijder and J. G. De Vries, United States Patent US005917049A, 1999.
2. *SAINTE* and *SADABS*; Bruker AXS Inc.: Madison, WI, 2007.
3. G. M. Sheldrick, *Acta Cryst.*, 2015, **A71**, 3.
4. G. M. Sheldrick, *Acta Cryst.*, 2015, **C71**, 3.
5. C. B. Hübschle, G. M. Sheldrick and B. Dittrich, *J. Appl. Crystallogr.* **2011**, *44*, 1281.
6. Diamond, Copyright © 1997-2014 Crystal Impact GbR, Bonn, Germany. Author: K. Brandenburg. Version 3.2k (05-2014)
7. CorelDRAW® X7, Version 17.0.0.491. ©2014
8. Mercury CSD 2.0 - New Features for the Visualization and Investigation of Crystal Structures. C. F. Macrae, I. J. Bruno, J. A. Chisholm, P. R. Edgington, P. McCabe, E. Pidcock, L. Rodriguez-Monge, R. Taylor, J. van de Streek and P. A. Wood, *J. Appl. Cryst.* 2008, **41**, 466–470.
9. Persistence of Vision Raytracer (Version 3.6), Persistence of Vision Pty. Ltd. **2004**, <http://www.povray.org>

10. GIMP 2.8: The GNU Image Manipulation Program. <http://www.gimp.org>.
11. X. Cui, Q. Yang, L. Yang, R. Krishna, Z. Zhang, Z. Bao, H. Wu, Q. Ren, W. Zhou, B. Chen and H. Xing, *Adv. Mater.*, 2017, **29**, 1606929.
12. C. A. Fernandez, P. K. Thallapally, R. K. Motkuri, S. K. Nune, J. C. Sumrak, J. Tian and J. Liu, *Cryst. Growth Des.*, 2010, **10**, 1037.
13. D. Britt, D. Tranchemontagne and O. M. Yagui, *Proc. Natl. Acad. Sci. USA*, 2008, **105**, 11623.
14. P. K. Thallapally, R. K. Motkuri, C. A. Fernandez, B. P. McGrail and G. S. Behrooz, *Inorg. Chem.*, 2010, **49**, 4909.
15. Y. Zhang, P. Zhang, W. Yu, J. Zhang, J. Huang, J. Wang, M. Xu, Q. Deng, Z. Zeng and S. Deng, *ACS Appl. Mater. Interfaces*, 2019, **11**, 10680.
16. J. Matito-Martos, A. Martin-Calvo, J. J. Gutiérrez-Sevillano, M. Haranczyk, Doblare, J. B. Parra, C. O. Ania and S. Calero, *Phys. Chem. Chem. Phys.*, 2014, **16**, 19884.
17. T. G. Glover, G. W. Peterson, B. J. Schindler, D. Britt and O. M. Yagui, *Chem. Eng. Sci.*, 2011, **66**, 163.
18. L. Li, I. da Silva, D. I. Kolokolov, X. Han, J. Li, G. Smith, Y. Cheng, L. L. Daemen, C. G. Morris, H. G. W. Godfrey, N. M. Jacques, X. Zhang, P. Manuel, M. D. Frogley, C. A. Murray, A. J. Ramirez-Cuesta, G. Cinque, C. C. Tang, A. G. Stepanov, S. Yang and M. Schröder, *Chem. Sci.*, 2019, **10**, 1472.
19. P. Brandt, A. Nuhnen, M. Lange, J. Möllmer, O. Weingart and C. Janiak, *ACS Appl. Mater. Interfaces*, 2019, **11**, 17350.
20. J. B. DeCoste, Tyler J. Demasky, M. J. Katz, O. K. Farha and J. T. Hupp, *New J. Chem.*, 2015, **39**, 2396.
21. M. R. Tchalala, P. M. Bhatt, K. N. Chappanda, S. R. Tavares, K. Adil, Y. Belmabkhout, A. Shkurenko, A. Cadiou, N. Heymans, G. De Weireld, G. Maurin, K. N. Salama and E. Eddaoudi, *Nat. Commun.*, 2019, **10**, 1328.
22. A. R. Leach. *Molecular modelling: principles and applications*. Prentice Hall, 2001.
23. T. Düren, F. Millange, G. Férey, K. S. Walton, R. Q. Snurr, *J. Phys. Chem. C*, 2007, **111**, 15350–15356.
24. M. V. Parkes, H. Demir, S. L. Teich-McGoldrick, D. S. Sholl, J. A. Greathouse, M. D. Allendorf, *Micropor. Mesopor. Mat.*, 2014, **194**, 190–199.
25. Web site for obtaining the source code of the program to calculate the accessible surface area. [https://people.bath.ac.uk/td222/research/surface\\_area/index.html](https://people.bath.ac.uk/td222/research/surface_area/index.html)  
Accessed Oct. 24, 2019.
